# Supplementary material
Source: PubMed Central journal article supplement (PMC8020672)

AS+neg. UBE3A NEUN DAPI

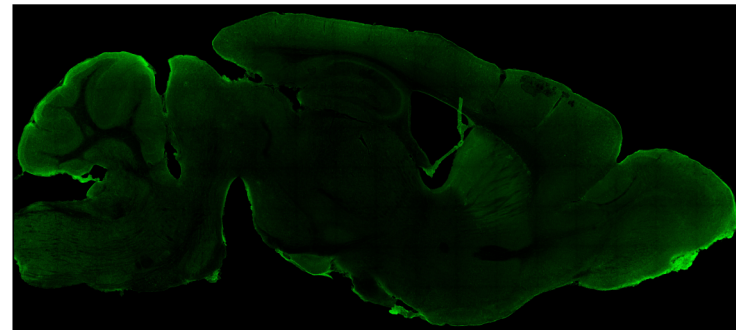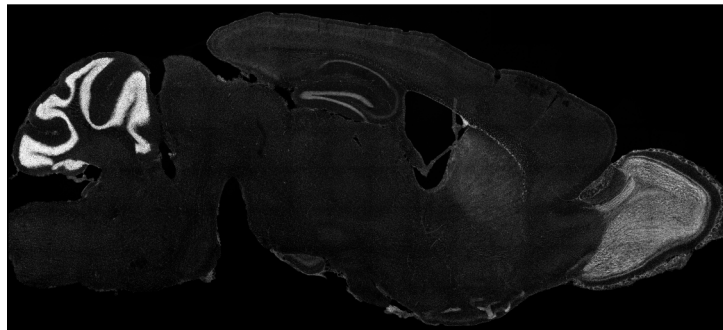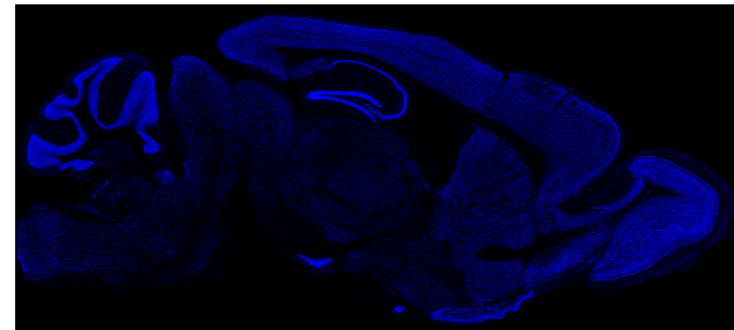

Cortex

Hippocampus

Cblm.

Spinal Cord

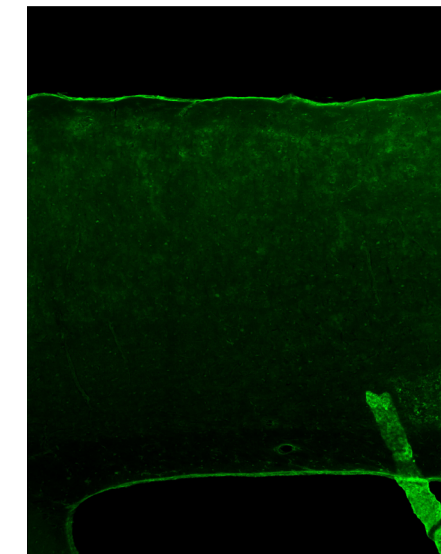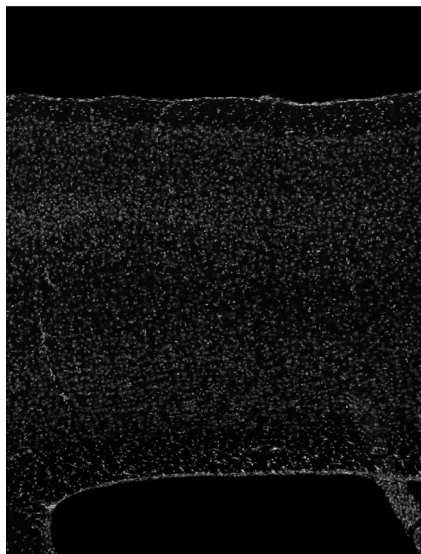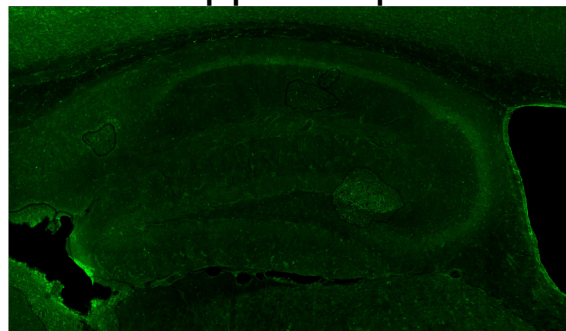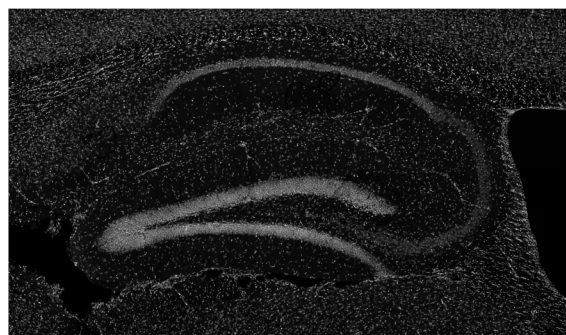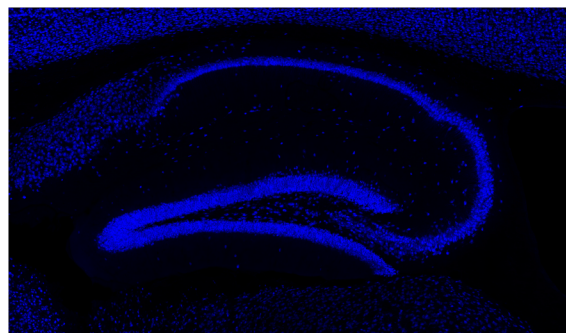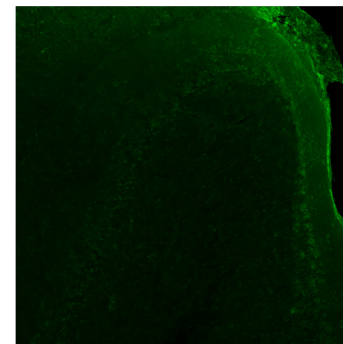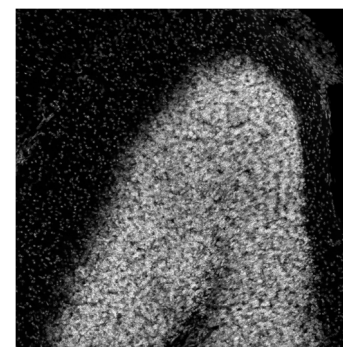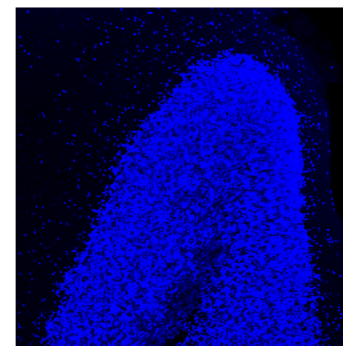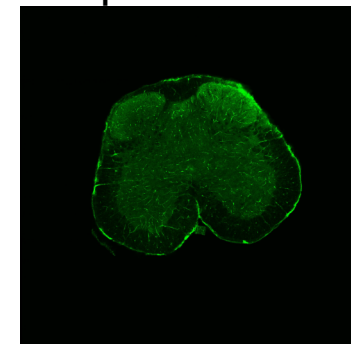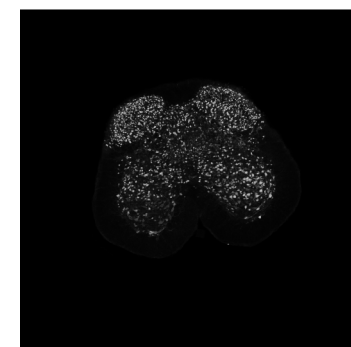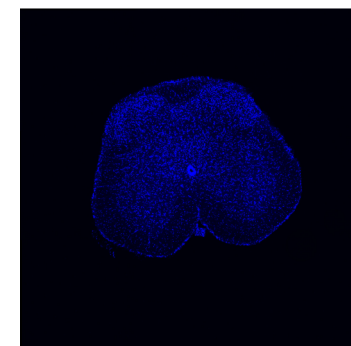



AS+jw33 UBE3A NEUN DAPI

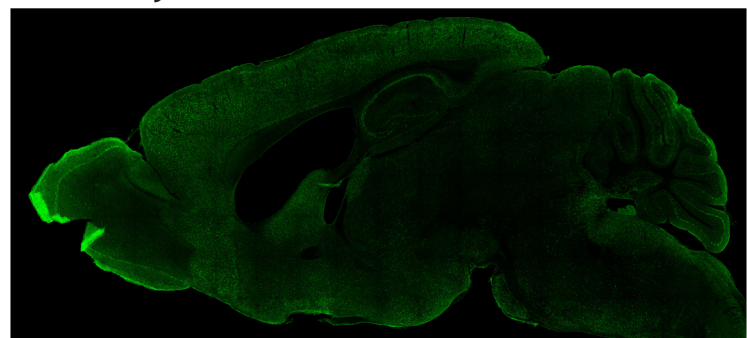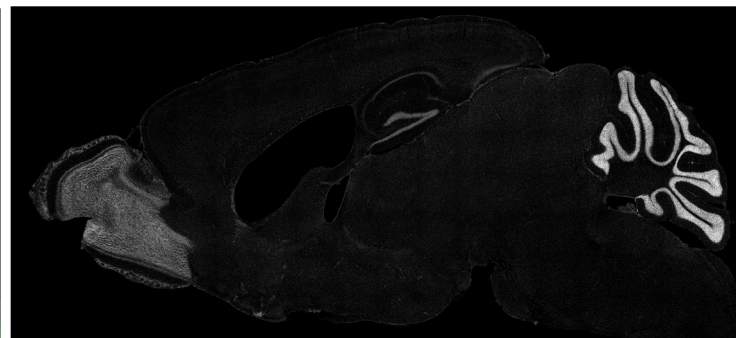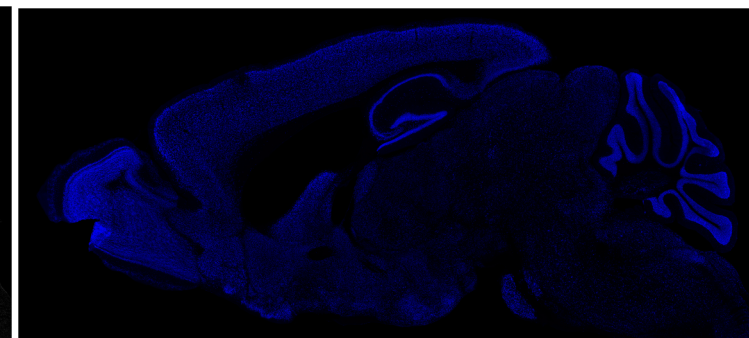

Cortex

Hippocampus

Cblm

Spinal Cord

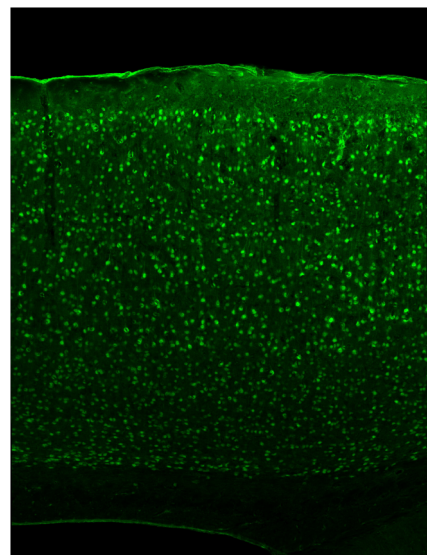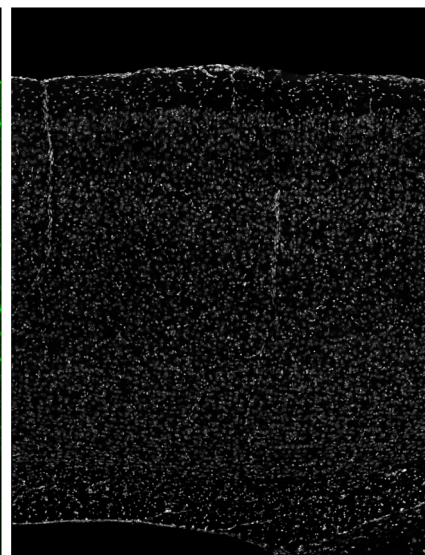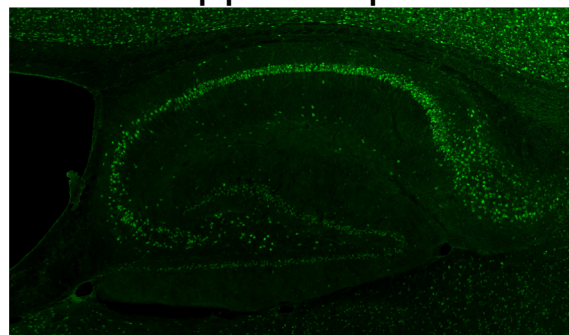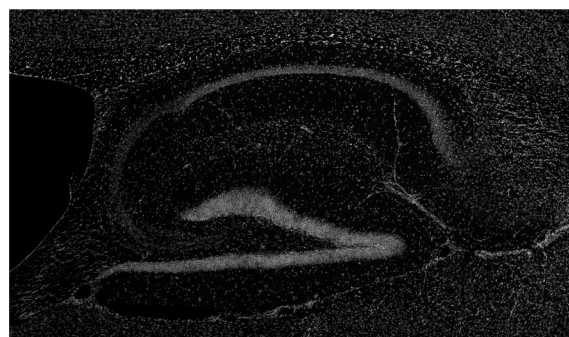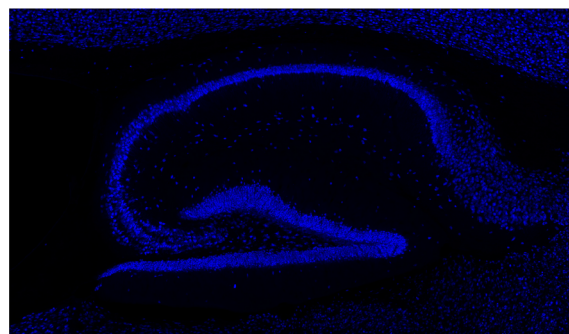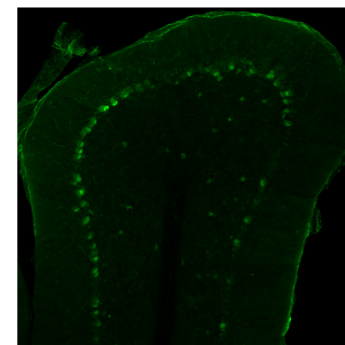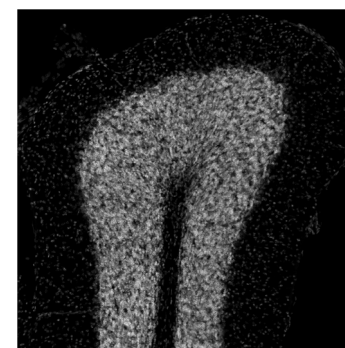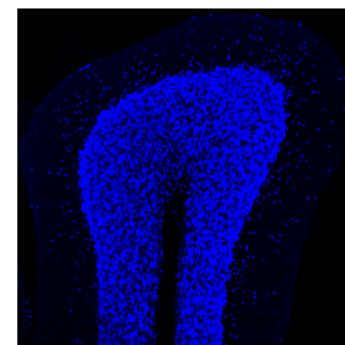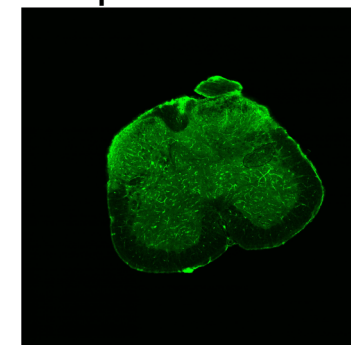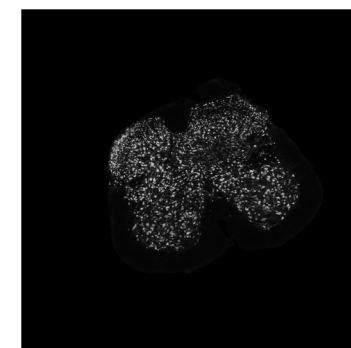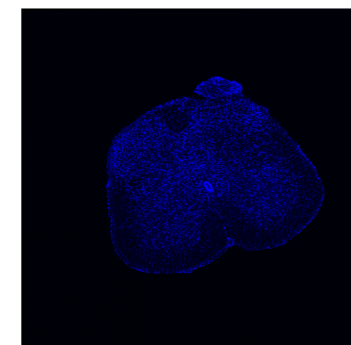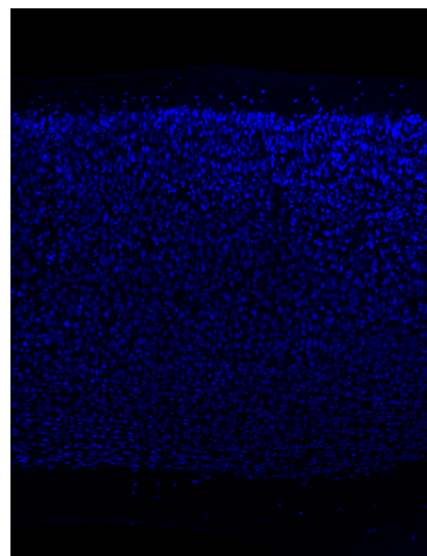

Supplement: NIHMS1676329-supplement-Sup_Fig_1.pdf [file NIHMS1676329-supplement-Sup_Fig_1.pdf]
