# Supplementary material
Source: PubMed Central journal article supplement (PMC8020672)

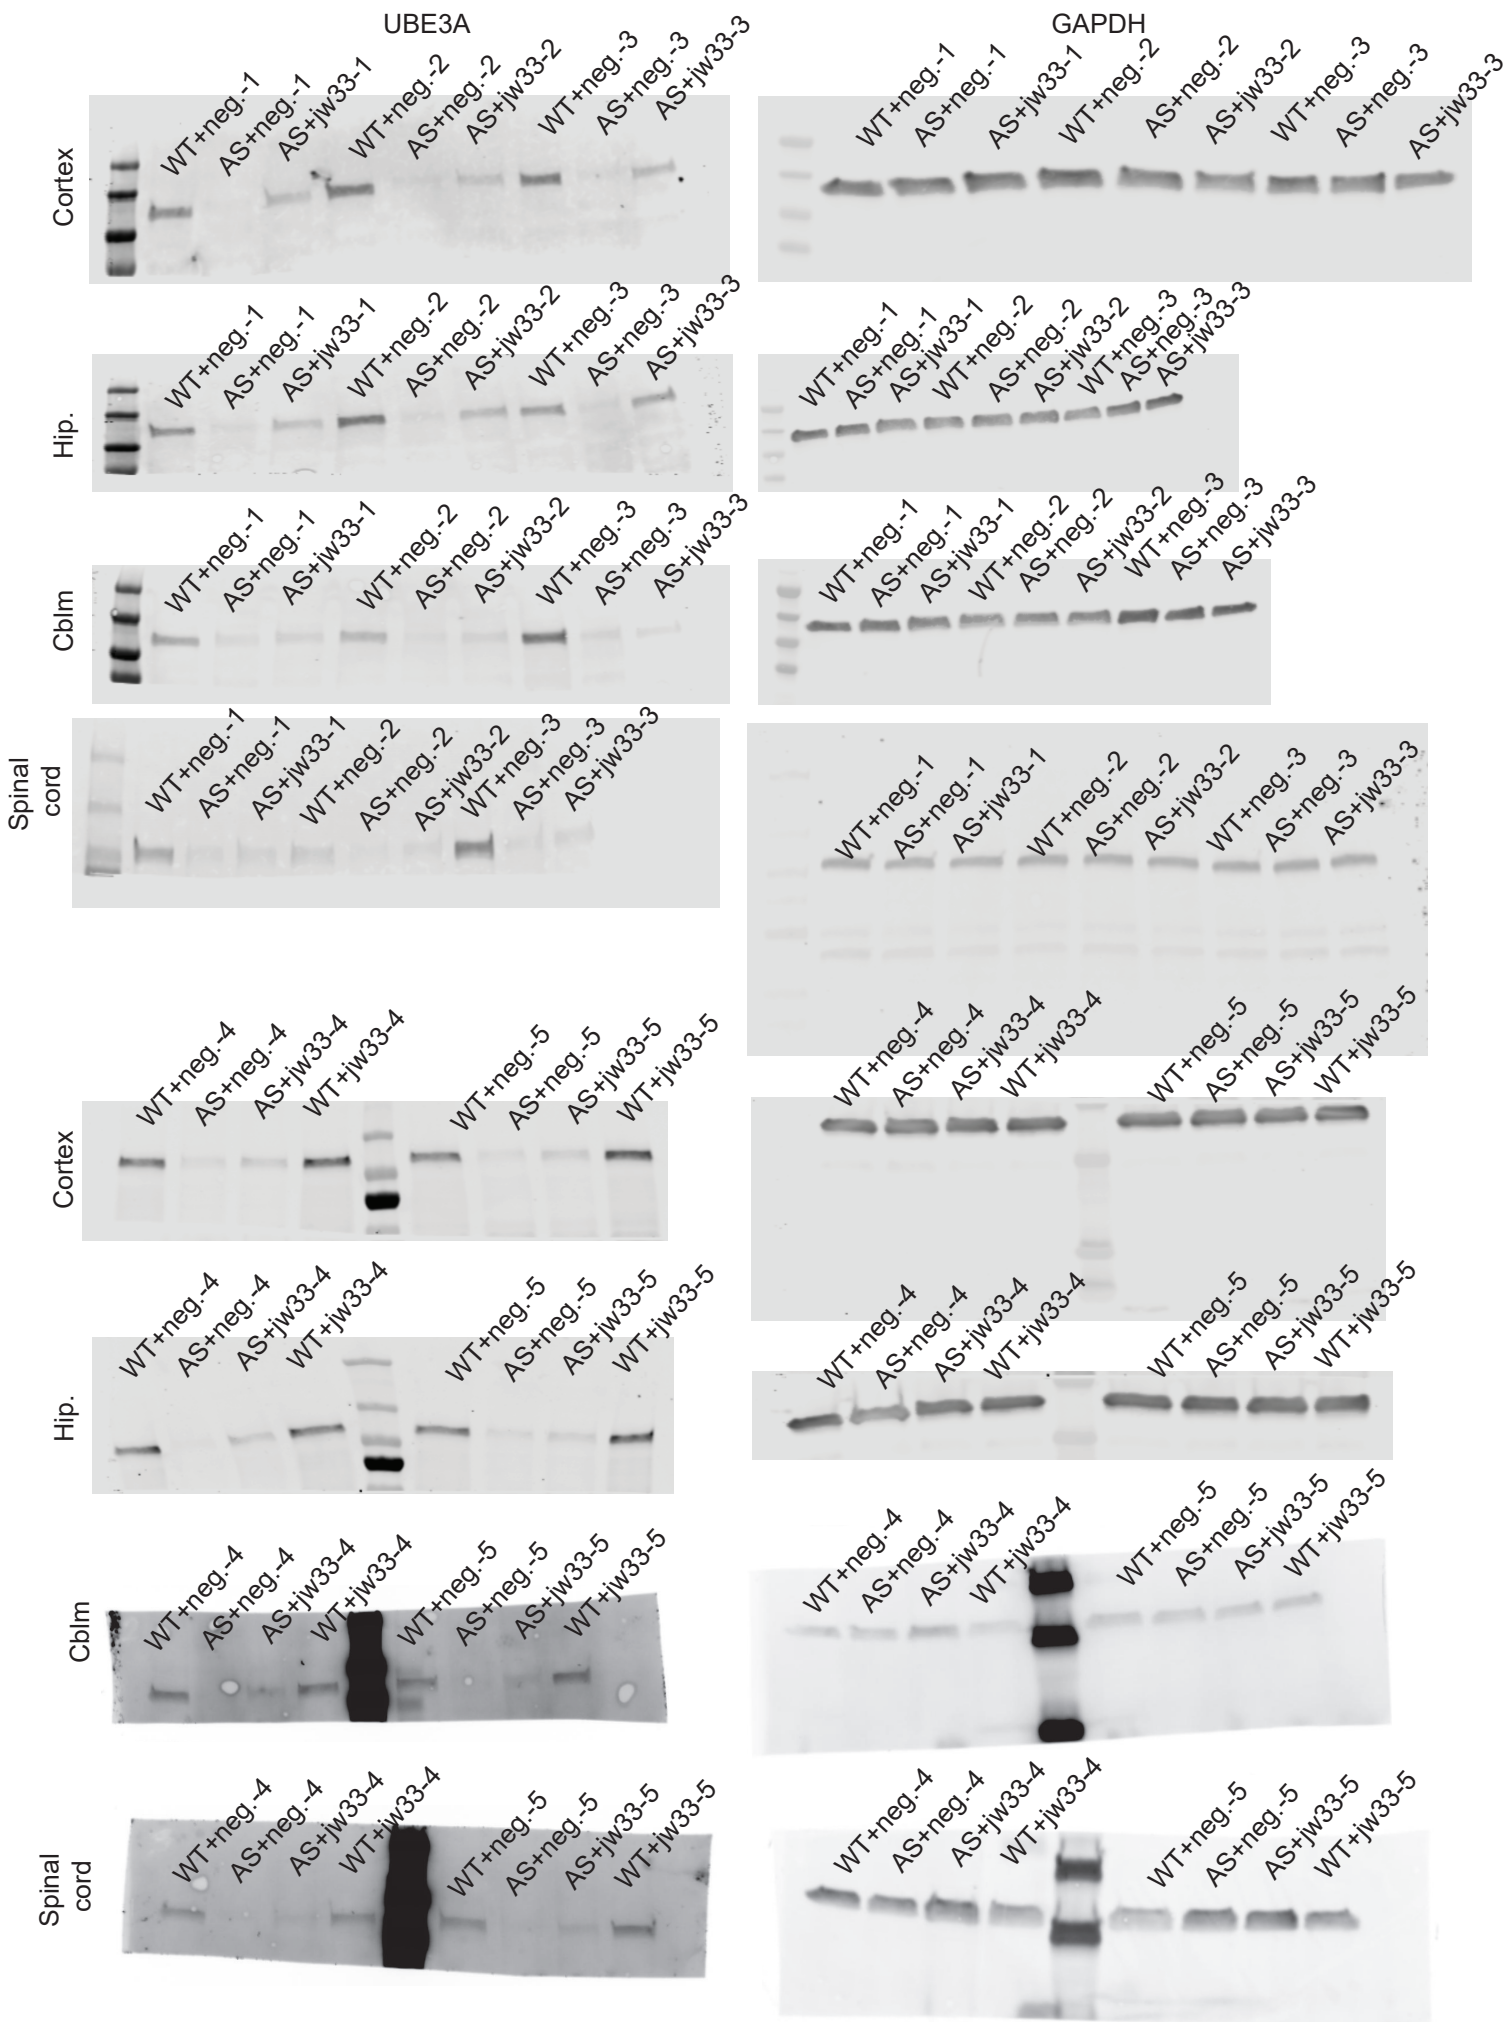

Supplement: NIHMS1676329-supplement-Sup_Fig_2.pdf [file NIHMS1676329-supplement-Sup_Fig_2.pdf]
